# Supplementary material
Source: MDPI journal article supplement (https://www.mdpi.com/1999-4907/11/4/476)
Supplement: s1 [file s1]

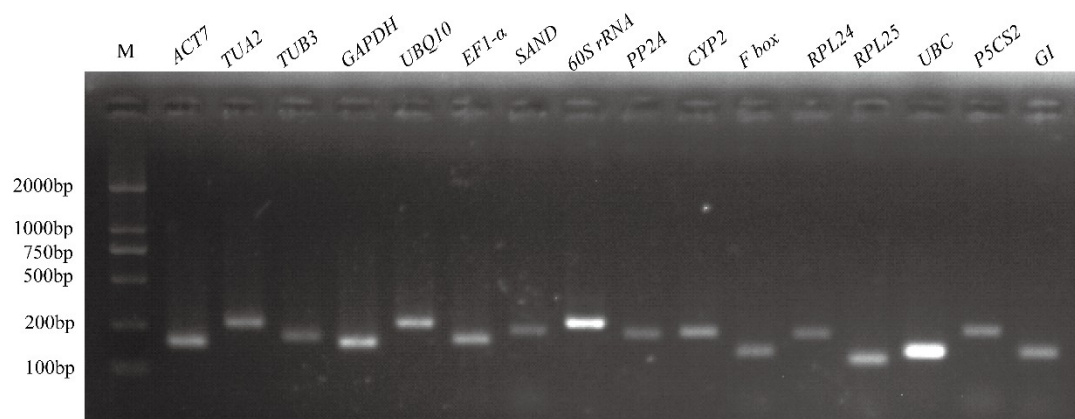

**Figure S1. Agarose gel electrophoresis of PCR products for each of the fourteen RGs and the two target genes.**

*ACT7*

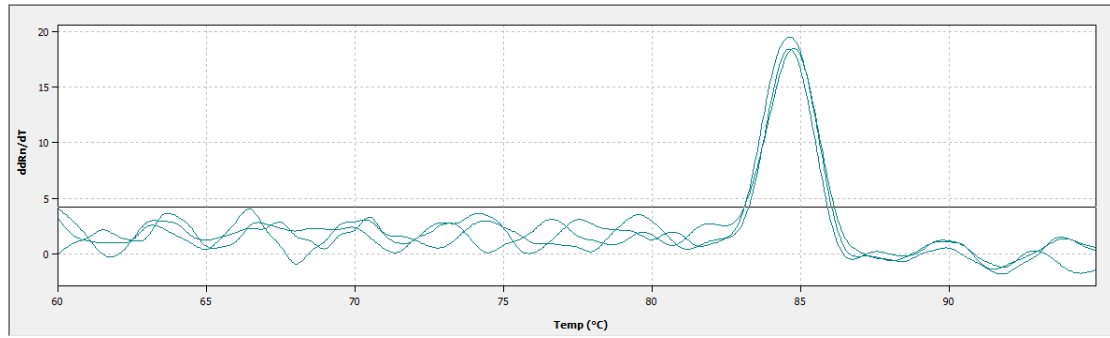

*TUA2*

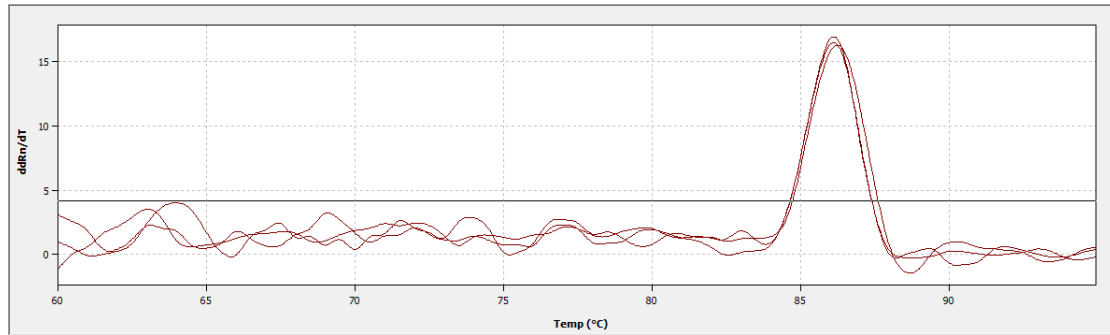

*TUB3*

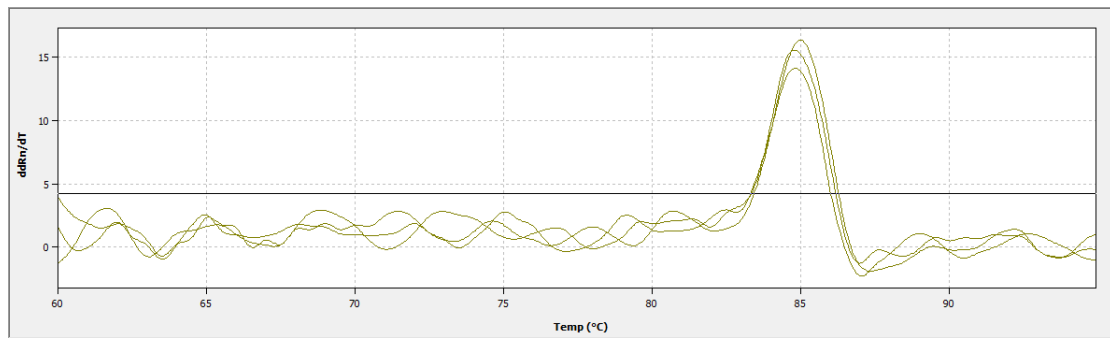

*GAPDH*

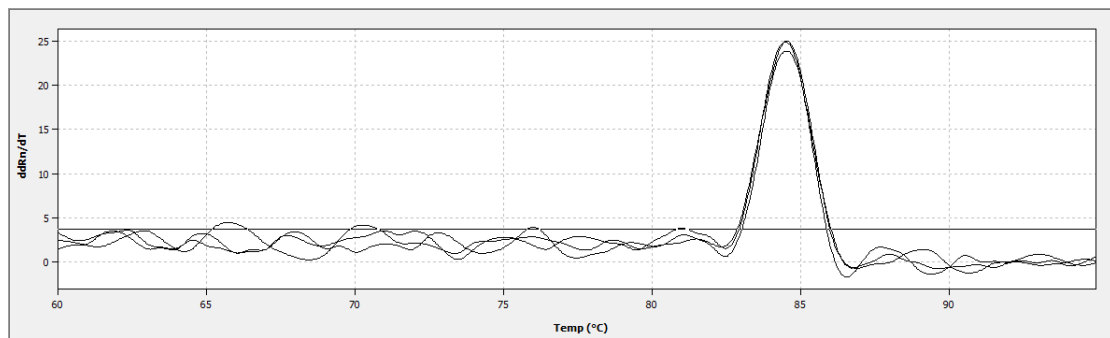

*UBQ10*

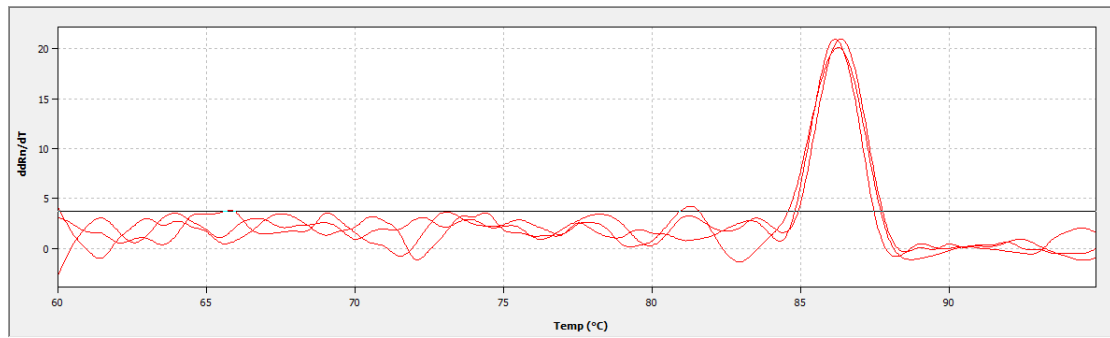

*EF1- $\alpha$*

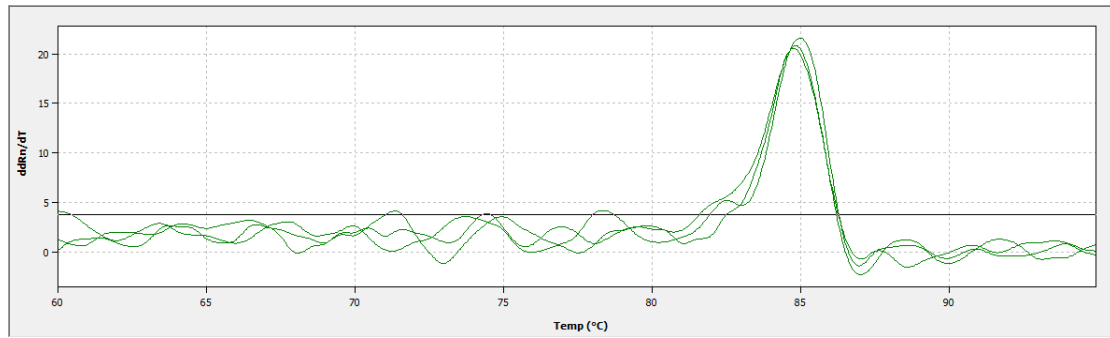

*SAND*

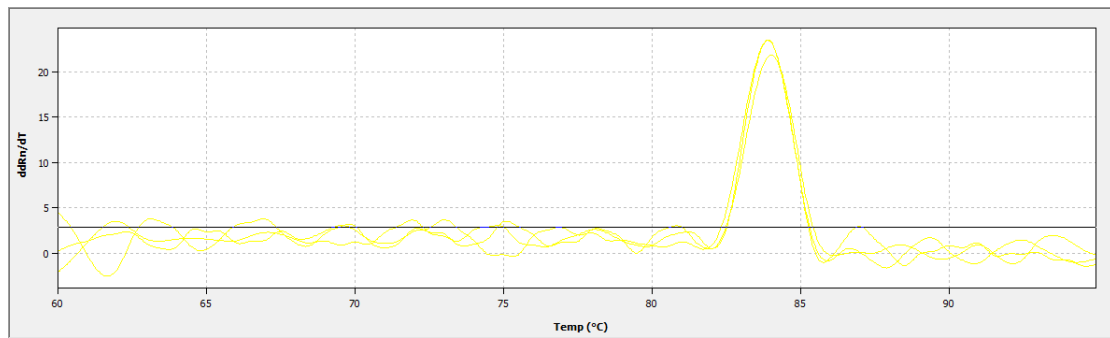

*60SrRNA*

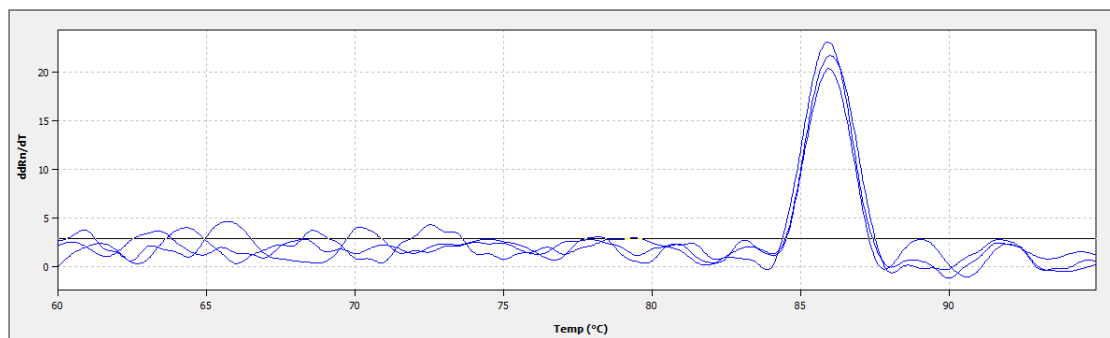

PP2A

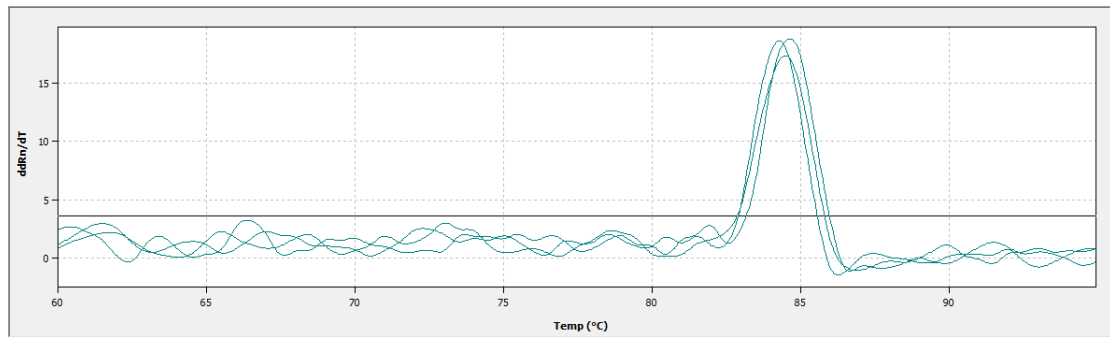

CYP2

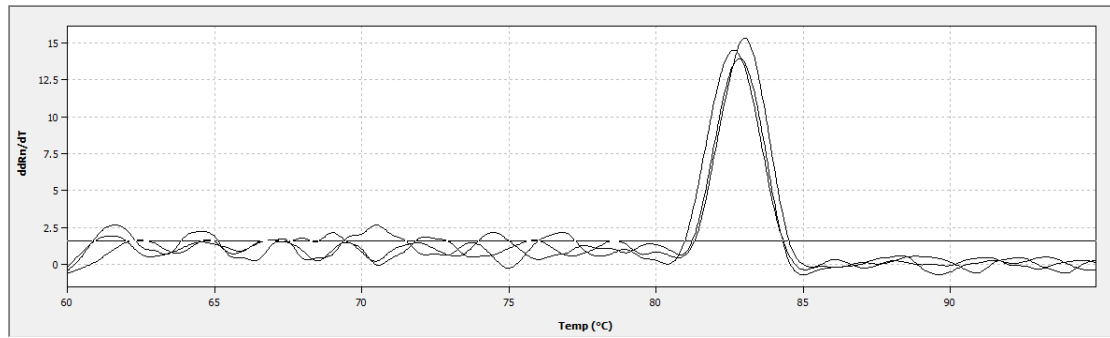

Fbox

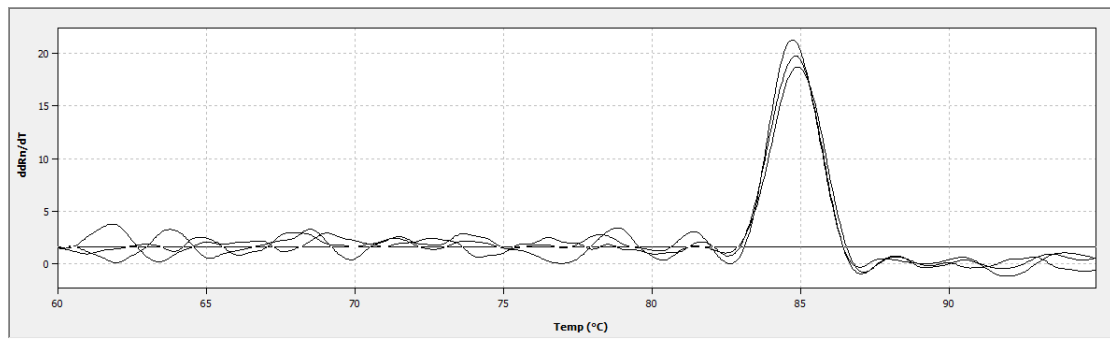

RPL24

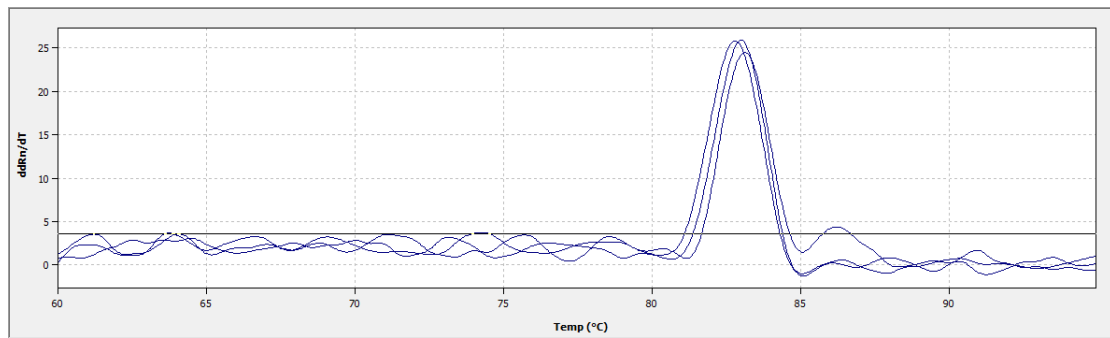

RPL25

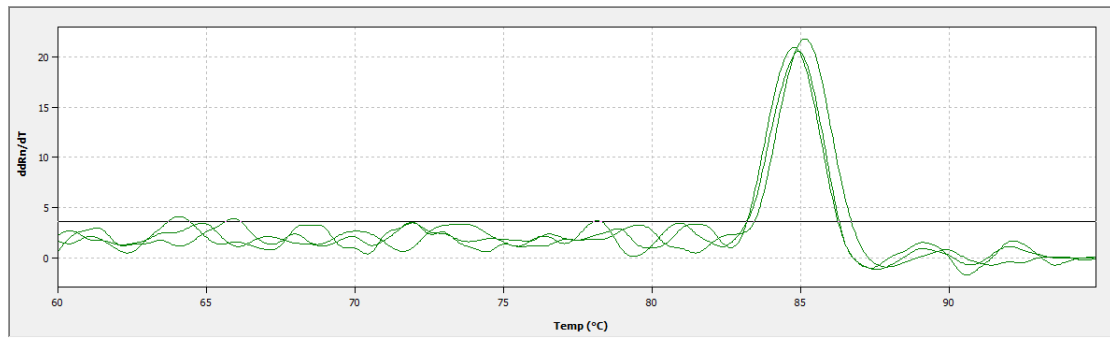

UBC

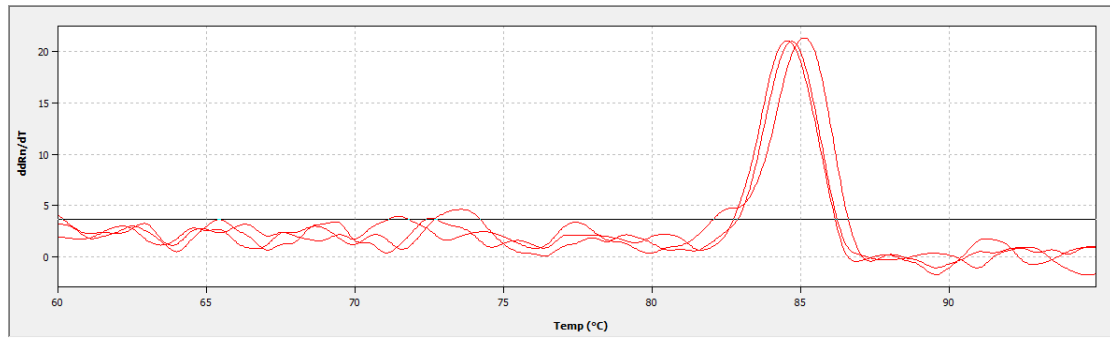

**Figure S2. Dissociation curves of the qRT-PCR amplicons for 14 RGs.**
